# Supplementary material for: A tumor-promoting mechanism mediated by retrotransposon-encoded reverse transcriptase is active in human transformed cell lines
Source: PubMed Central journal article supplement (PMC3926826; doi:10.18632/oncotarget.1403), 2013-10-14

**A tumor-promoting mechanism mediated by retrotransposon-encoded reverse transcriptase is active in human transformed cell lines – Sciamanna et al**

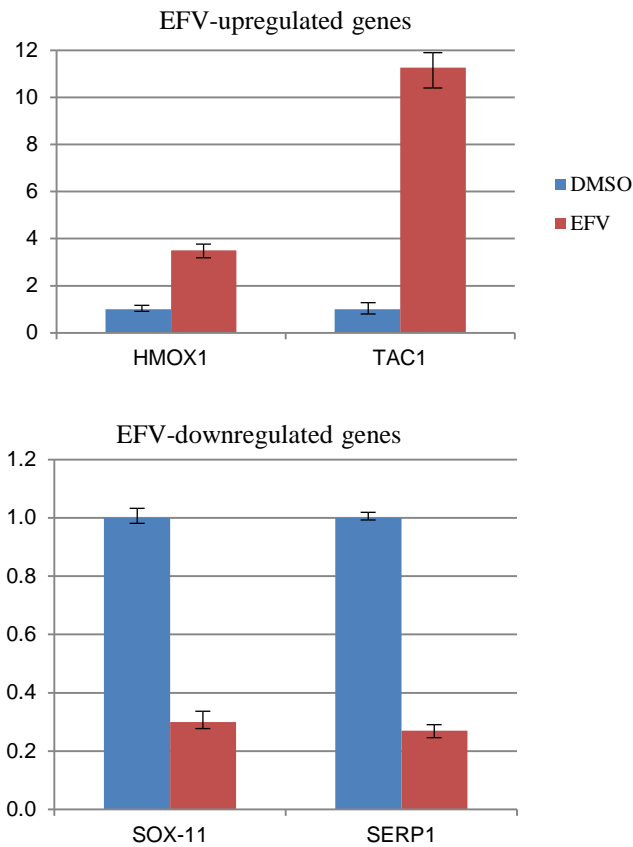

**Figure S1:** Real Time PCR analysis of gene expression in EFV-treated A-375 cells. The histograms represent the fold-increase or decrease in mRNA levels for the indicated genes, selected from the list in Additional file 1, in EFV-treated cells relative to levels measured in the DMSO samples (set as reference). Bars represent the standard error of the mean expression level and delimit the calculated maximum and minimum level of expression. Triplicates for each sample were analyzed in two independent experiments.

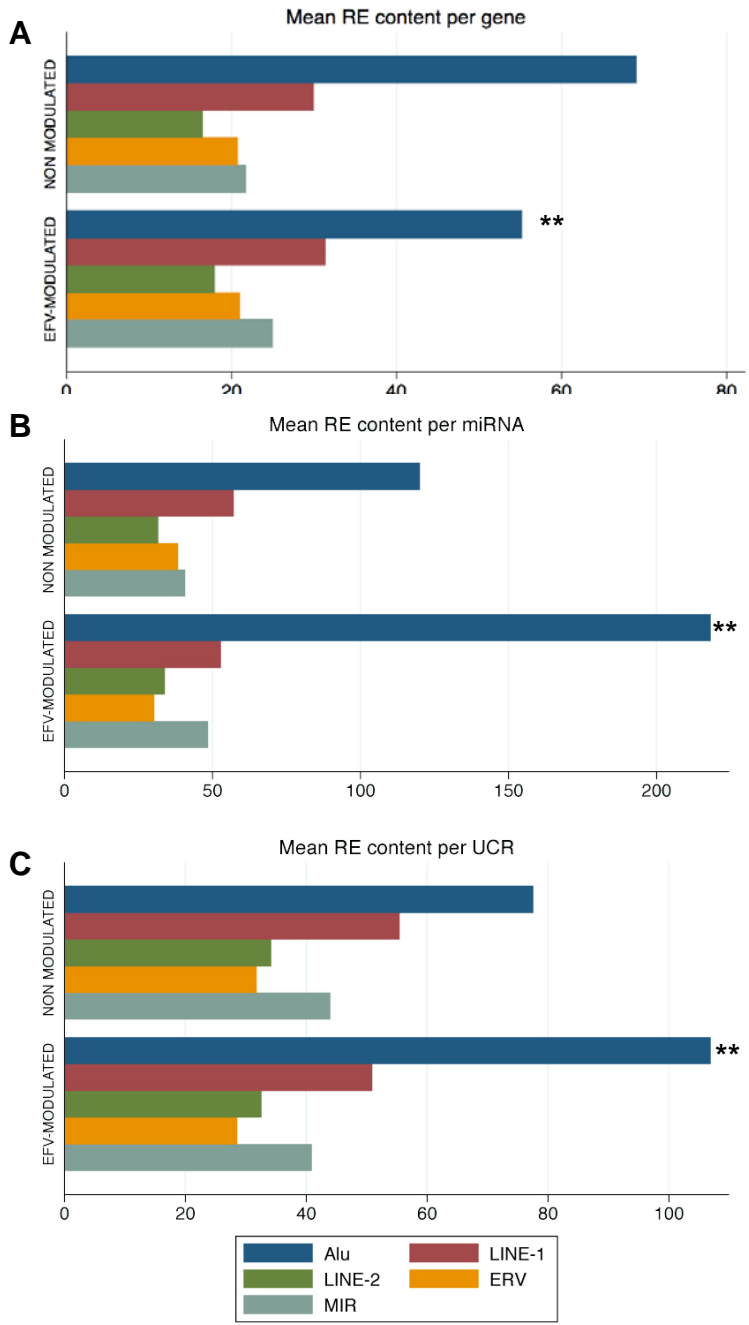

Supplement: oncotarget-04-2271-s002.pdf [file oncotarget-04-2271-s002.pdf]
